# Supplementary material for: In-planta Gene Targeting in Barley Using Cas9 With and Without Geminiviral Replicons
Source: Front Genome Ed. 2021 Jun 15;3:663380. doi: 10.3389/fgeed.2021.663380 (PMC8525372; doi:10.3389/fgeed.2021.663380)
Supplement: Supplementary Table 7 — Analysis of T0 lines for indels at target sites A and B in HORVU4Hr1G061310. [file Table_7.XLSX]

## Sheet: Sheet1
Supplementary table 7 - Analysis of T0 lines for indels at target sites A and B in HORVU4Hr1G061310
Line	% WT target A	% indels target A	% WT target B	% indels target B
WT	100	0	100	0
1	47	51	100	0
2	100	0	47	51
3	100	0	76	34
4	47	50	100	0
5	46	52	47	52
6	100	0	49	49
7	100	0	49	51
8	77	21	76	20
9	49	49	78	18
10	100	0	27	70
11	100	0	12	38
12	47	51	69	25
13	49	49	45	52
14	100	0	31	21
15	46	52	ND	19
16	47	50	ND	14
17	100	0	ND	35
18	100	0	ND	32
Notes:
T0 lines tested for the presence of indels at target sites A and B in HORVU4Hr1G061310 to determine efficiency of corresponding guides A and B
Indel % determined by Sanger sequencing and ICE CRISPR analysis tool as described in methods
